# Supplementary material for: Brachybacterium epidermidis Sp. Nov., a Novel Bacterial Species Isolated from the Back of the Right Hand, in a 67-Year-Old Healthy Woman
Source: Hindawi journal article supplement (doi:10.1155/2022/2875994), 2022-03-29
Supplement: f1 [file 2875994.f1.zip]

| <b>Fatty acids</b> | <b>Name</b>                  | <b>Mean relative %<sup>a</sup></b> |
|--------------------|------------------------------|------------------------------------|
| 15:0 anteiso       | 12-methyl-tetradecanoic acid | 69.2 ± 5.0                         |
| 17:0 anteiso       | 14-methyl-Hexadecanoic acid  | 15.9 ± 3.0                         |
| 16:0 iso           | 14-methyl-Pentadecanoic acid | 6.6 ± 1.1                          |
| 18:1n7             | 11-Octadecenoic acid         | 2.8 ± 0.3                          |
| 15:0 iso           | 13-methyl-tetradecanoic acid | 1.5 ± 0.7                          |
| 14:0 iso           | 12-methyl-Tridecanoic acid   | 1.3 ± 0.3                          |
| 16:0               | Hexadecanoic acid            | 1.3 ± 0.3                          |
| 18:2n6             | 9,12-Octadecadienoic acid    | TR                                 |
| 18:1n9             | 9-Octadecenoic acid          | TR                                 |
| 17:0 iso           | 15-methyl-Hexadecanoic acid  | TR                                 |

<sup>a</sup> Mean peak area percentage ; TR = trace amounts < 1 %
