# Supplementary material for: Brachybacterium epidermidis Sp. Nov., a Novel Bacterial Species Isolated from the Back of the Right Hand, in a 67-Year-Old Healthy Woman
Source: Hindawi journal article supplement (doi:10.1155/2022/2875994), 2022-03-29
Supplement: f1 [file 2875994.f1.zip]

|                                             | dDDH with <i>Brachybacterium epidermidis</i> strain Q2903 (in %) | C.I. (in %)   | G+C content difference (in %) |
|---------------------------------------------|------------------------------------------------------------------|---------------|-------------------------------|
| Brachybacterium muris DSM 15460             | 31,5                                                             | [29,1 - 34]   | 0,7                           |
| Brachybacterium paraconglomeratum KCTC 9916 | 22,7                                                             | [20.4 - 25.2] | 1,8                           |
| Brachybacterium aquaticum DSM 28796         | 22,6                                                             | [20.3 - 25.1] | 1,61                          |
| Brachybacterium massiliense MT5             | 22,3                                                             | [20.0 - 24.8] | 0,22                          |
| Brachybacterium squillarum M-6-3            | 22,1                                                             | [19.9 - 24.6] | 2,35                          |
| Brachybacterium faecium DSM 4810            | 22                                                               | [19.7 - 24.4] | 1,62                          |
| Brachybacterium saurashtrense DSM23186      | 21,7                                                             | [19.5 - 24.2] | 2,32                          |
| Brachybacterium timonense Marseille-P4339   | 21,6                                                             | [19.3 - 24.0] | 3,14                          |
| Brachybacterium vulturis VM2412             | 21,5                                                             | [19.3 - 24.0] | 0,41                          |
| Brachybacterium nesterenkovii CIP 104813    | 21,5                                                             | [19.2 - 23.9] | 2                             |
| Brachybacterium ginsengisoli KCTC 29226     | 21,4                                                             | [19.1 - 23.8] | 1,14                          |
| Brachybacterium avium VR2415                | 21,3                                                             | [19.1 - 23.8] | 0                             |
| Brachybacterium endophyticum M1HQ-2         | 20,6                                                             | [18.4 - 23.0] | 0,62                          |
