# Supplementary figures and images for: Brachybacterium epidermidis Sp. Nov., a Novel Bacterial Species Isolated from the Back of the Right Hand, in a 67-Year-Old Healthy Woman
Source: Hindawi journal article supplement (doi:10.1155/2022/2875994), 2022-03-29

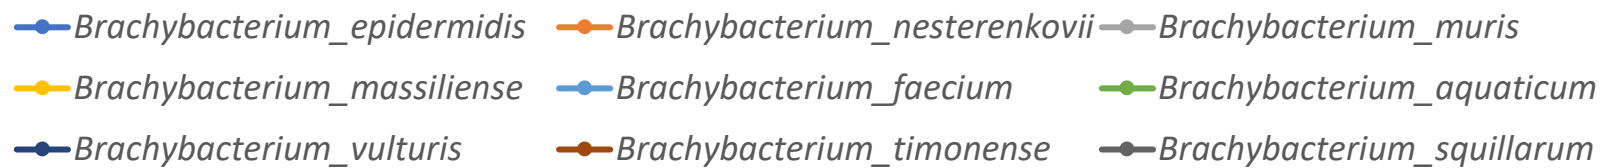

Supplement: f1 [file 2875994.f1.zip]
